# Supplementary material for: Connexin 32 dysfunction promotes ethanol-related hepatocarcinogenesis via activation of Dusp1-Erk axis
Source: PubMed Central journal article supplement (PMC4811513; doi:10.18632/oncotarget.6511), 2015-12-09
Supplement: oncotarget-07-2009-s001.pdf [file oncotarget-07-2009-s001.pdf]

SUPPLEMENTARY FIGURES AND TABLE

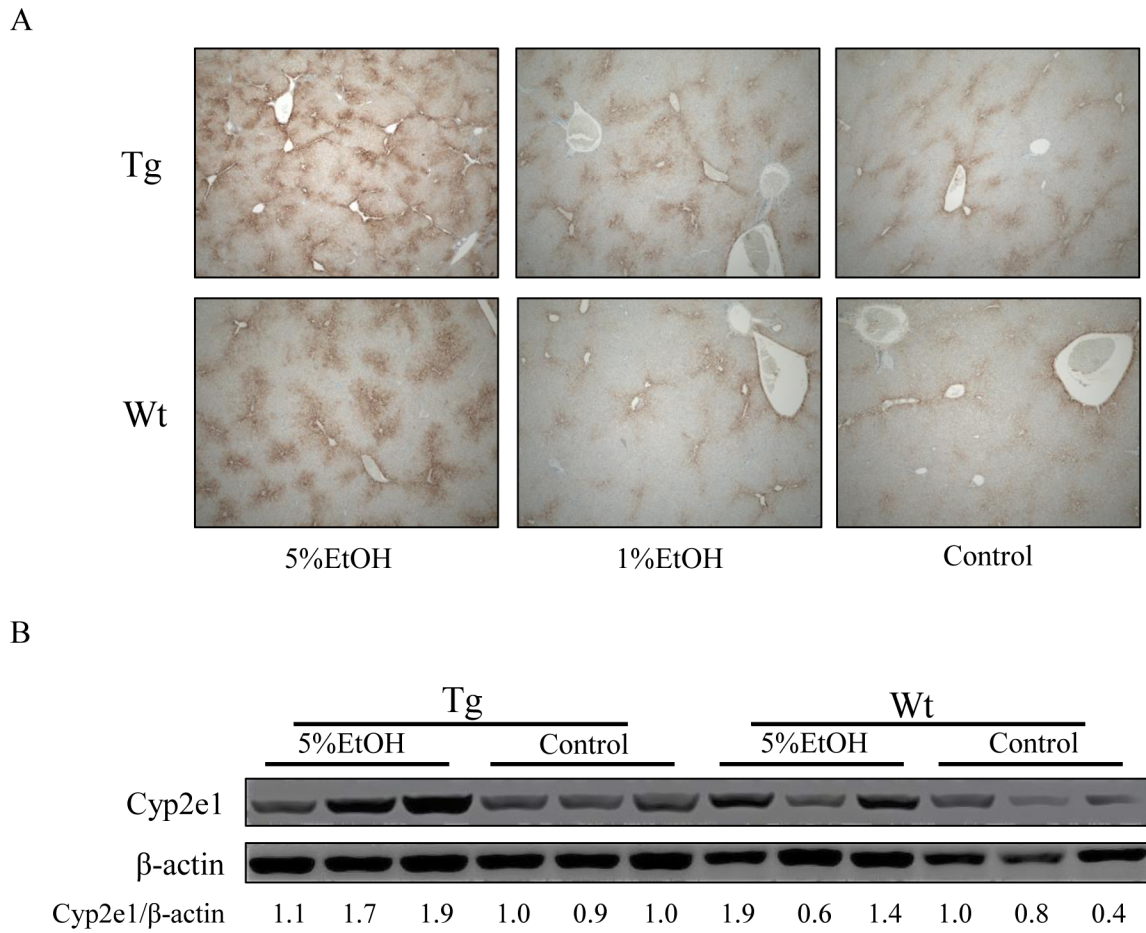

**Supplementary Figure S1: EtOH intake induces Cyp2e1 expression in centrilobular region and higher expression in Tg rats as compared to Wt rats. Immunohistochemical staining A. and western blotting B. for Cyp2e1.**

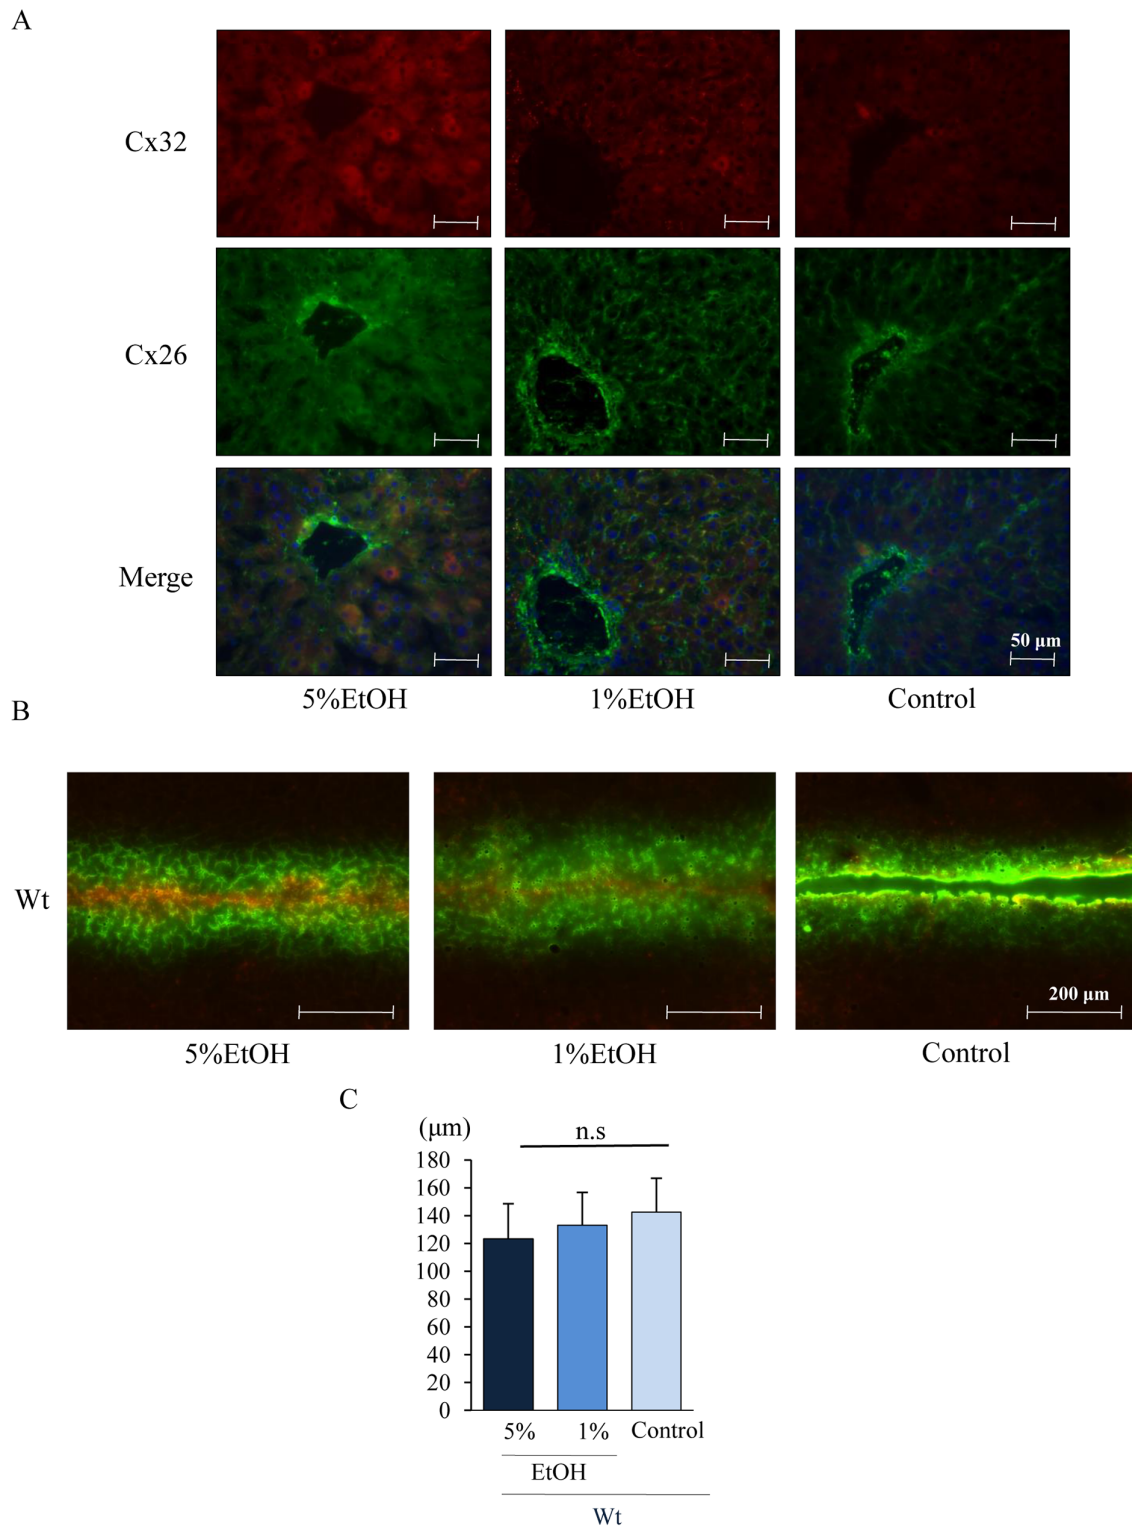

**Supplementary Figure S2: GJIC capacity tended to decrease by EtOH intake but no significant difference was observed in Wt rats.** **A.** Immunofluorescence staining for Cx32 (red) and Cx26 (green) in livers of Tg rats. **B.** Spread of Lucifer yellow through gap junction. Merged pictures of Lucifer yellow (green) and rhodamine-dextran (red), and **C.** distance of Lucifer yellow spread (µm) in Wt rats. Data are presented as mean ± SD,  $n = 5$  per group.

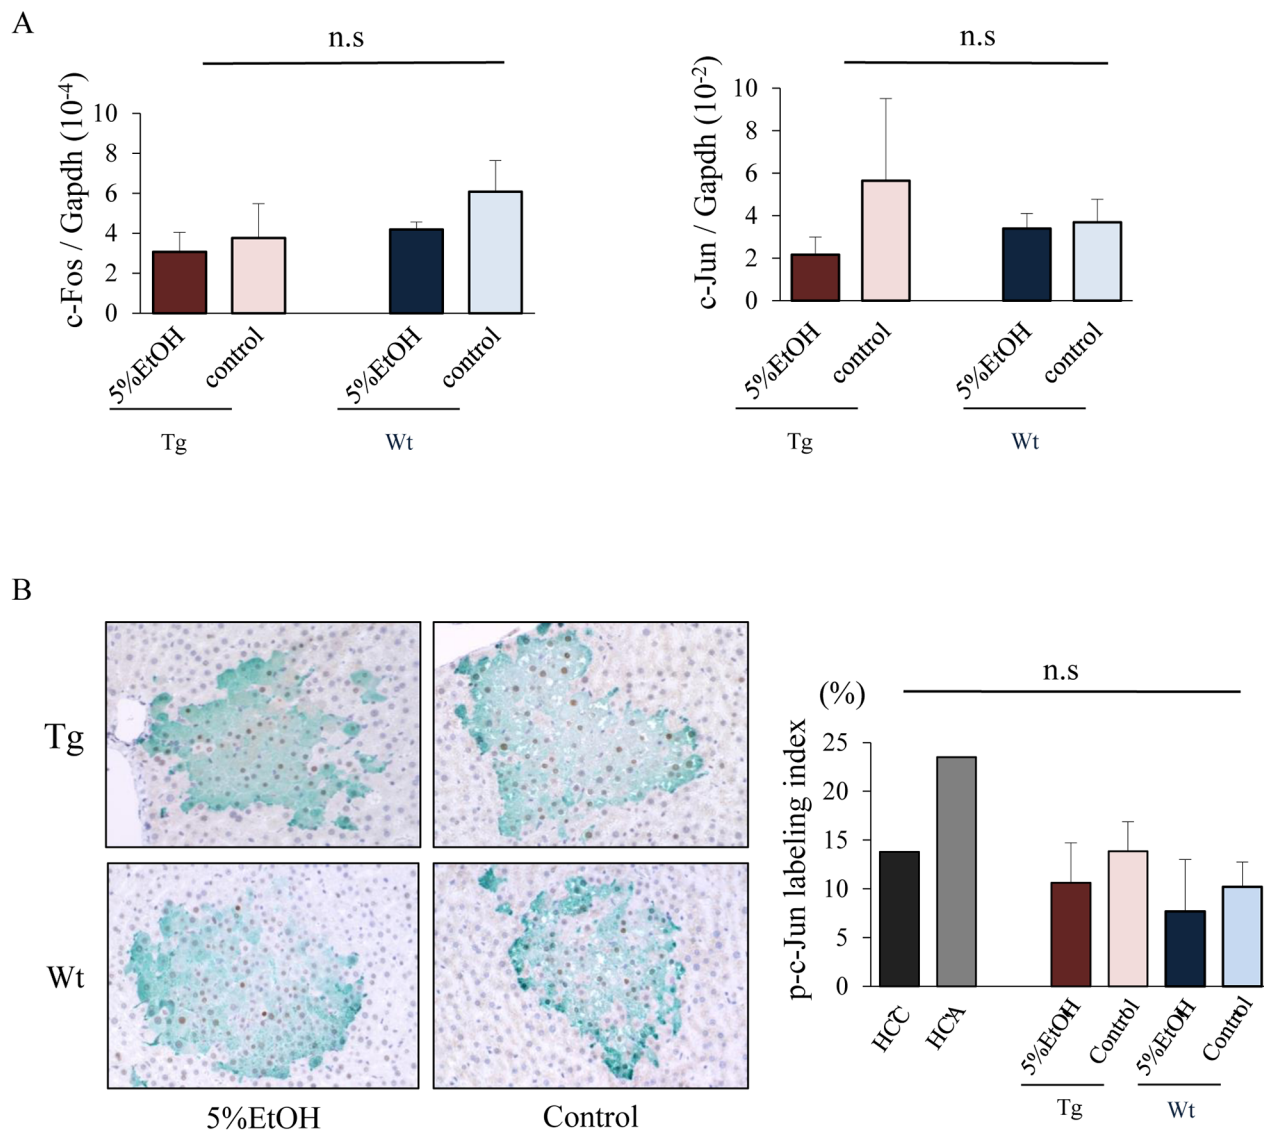

**Supplementary Figure S3: AP-1 (c-Fos and c-Jun complex) expression was not altered by EtOH intake in both Tg and Wt rats.** **A.** mRNA expression levels of c-Fos and c-Jun detected by quantitative RT-PCR. **B.** Immunohistochemical staining for p-c-Jun (brown) and GST-P (green). The percentage of p-c-Jun positive hepatocytes in HCC, HCA and GST-P positive foci in each group. Data are presented as mean  $\pm$  SD,  $n = 4-5$  per group.

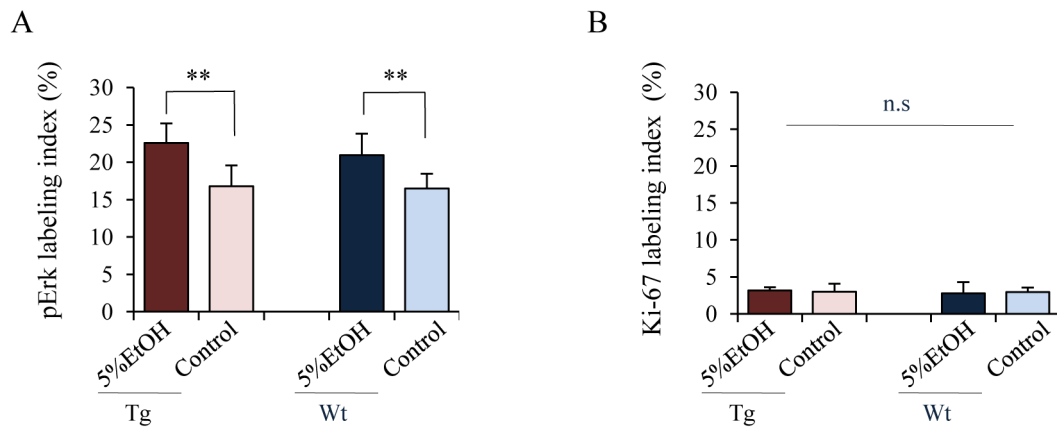

**Supplementary Figure S4: EtOH enhanced pErk expression but did not altered Ki-67 labeling index in sinusoidal lining cells.** Percentage of pErk **A.** and Ki-67 **B.** in sinusoidal lining cells. Data are presented as mean  $\pm$  SD,  $n = 5$  per group, at least 1,000 sinusoidal lining cells per rats. \*\*:  $P < 0.01$



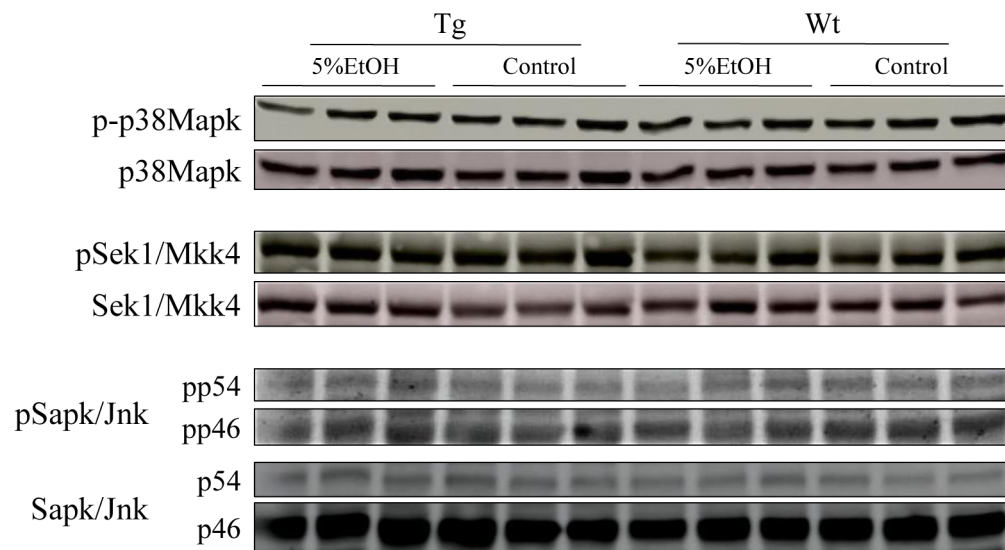

**Supplementary Figure S5: The protein expression level of various components of the MAPK signaling pathway in Tg and Wt rats.** Western blotting for p-p38Mapk (Thr180/Tyr182), p38Mapk, pSek1/Mkk4 (Ser80), Sek1/Mkk4, pSapk/Jnk (Thr183/Tyr185) and Sapk/Jnk.

**Supplementary Table S1: Serum levels of hepatic enzymes, lipids and albumin in Tg and Wt rats.**

|    |         | No. | Alb(g/dl)     | ALP(U/L)      | AST(U/L)        | ALT(U/L)        | $\gamma$ GTP(U/L) | LDH(U/L)      | T-chol(mg/dl)   |
|----|---------|-----|---------------|---------------|-----------------|-----------------|-------------------|---------------|-----------------|
| Tg | 5%EtOH  | 12  | 4.1 $\pm$ 0.2 | 481 $\pm$ 108 | 63.3 $\pm$ 5.6  | 42.5 $\pm$ 7.5  | 1.6 $\pm$ 1.2     | 315 $\pm$ 183 | 60.1 $\pm$ 7.8  |
|    | 1%EtOH  | 11  | 4.1 $\pm$ 0.1 | 498 $\pm$ 151 | 63.7 $\pm$ 6.3  | 45.7 $\pm$ 6.1  | 1.7 $\pm$ 0.5     | 320 $\pm$ 176 | 69.4 $\pm$ 8.1  |
|    | Control | 12  | 4.0 $\pm$ 0.1 | 510 $\pm$ 116 | 70.5 $\pm$ 10.4 | 54.1 $\pm$ 13.2 | 1.2 $\pm$ 0.1     | 307 $\pm$ 120 | 65.3 $\pm$ 6.7  |
| Wt | 5%EtOH  | 12  | 4.1 $\pm$ 0.1 | 635 $\pm$ 560 | 67.1 $\pm$ 29.7 | 61.9 $\pm$ 83.1 | 1.5 $\pm$ 1.5     | 247 $\pm$ 152 | 65.6 $\pm$ 13.1 |
|    | 1%EtOH  | 12  | 4.1 $\pm$ 0.1 | 491 $\pm$ 148 | 67.9 $\pm$ 12.4 | 48.4 $\pm$ 11.0 | 0.8 $\pm$ 0.8     | 272 $\pm$ 134 | 67.8 $\pm$ 9.0  |
|    | Control | 12  | 4.1 $\pm$ 0.1 | 541 $\pm$ 204 | 66.5 $\pm$ 8.1  | 44.8 $\pm$ 11.0 | 0.8 $\pm$ 0.4     | 374 $\pm$ 165 | 66.4 $\pm$ 12.7 |

Tg, connexin32 dominant negative transgenic; Wt, wild-type

Alb, Plasma albumin; ALP, alkaline phosphatase; AST, aspartate aminotransferase; ALT, alanine aminotransferase;  $\gamma$ GTP, gamma-glutamyl transpeptidase; LDH, lactate dehydrogenase; T-chol, total cholesterol
